# Supplementary material for: Association of Carotid Intima‐Media Thickness and Other Carotid Ultrasound Features With Incident Dementia in the ARIC‐NCS
Source: PubMed Central journal article supplement — J Am Heart Assoc. 2021 Apr 17;10(9):e020489. doi: 10.1161/JAHA.120.020489 (PMC8200760; doi:10.1161/jaha.120.020489), 2021-04-17
Supplement: JAH3-10-e020489-s001.pdf [file JAH3-10-e020489-s001.pdf]

# **SUPPLEMENTAL MATERIAL**

**Table S1. Odds ratios (95% confidence intervals) of vascular dementia by quintiles or per 1-SD increment: the Atherosclerosis Risk in Communities (ARIC) study, 1990–2013.**

|                      | <b>cIMT quintiles (mm)</b>                |                      |                        |                        |                   | <b>cIMT continuous per 1 SD (0.15)</b> |
|----------------------|-------------------------------------------|----------------------|------------------------|------------------------|-------------------|----------------------------------------|
|                      | <b>&lt; 0.58</b>                          | <b>0.58 – 0.64</b>   | <b>0.65 – &lt;0.71</b> | <b>0.71 – &lt;0.80</b> | <b>&gt; 0.80</b>  |                                        |
| Vascular dementia, n | 13                                        | 22                   | 24                     | 29                     | 50                | 138                                    |
| N at risk            | 1,163                                     | 1,164                | 1,164                  | 1,164                  | 1,164             | 5,819                                  |
| <b>OR (95% CI)</b>   |                                           |                      |                        |                        |                   |                                        |
| Model 1              | 1 (ref)                                   | 1.38 (0.69, 2.79)    | 1.32 (0.66, 2.64)      | 1.44 (0.73, 2.83)      | 2.16 (1.13, 4.12) | 1.21 (1.04, 1.41)                      |
| Model 2              | 1 (ref)                                   | 1.29 (0.63, 2.60)    | 1.25 (0.72, 2.50)      | 1.30 (0.66, 2.58)      | 1.84 (0.95, 3.55) | 1.17 (0.99, 1.37)                      |
| Model 3              | 1 (ref)                                   | 1.30 (0.64, 2.64)    | 1.22 (0.61, 2.45)      | 1.28 (0.65, 2.55)      | 1.78 (0.92, 3.45) | 1.15 (0.98, 1.35)                      |
|                      | <b>IAD quintiles (mm)</b>                 |                      |                        |                        |                   | <b>IAD continuous per 1 SD (0.83)</b>  |
|                      | <b>&lt; 6.77</b>                          | <b>6.77 – 7.18</b>   | <b>7.19 – 7.57</b>     | <b>7.58 – 8.10</b>     | <b>&gt; 8.11</b>  |                                        |
| Vascular dementia, n | 23                                        | 15                   | 26                     | 22                     | 46                | 132                                    |
| N at risk            | 1,125                                     | 1,104                | 1,113                  | 1,110                  | 1,120             | 5,572                                  |
| <b>OR (95% CI)</b>   |                                           |                      |                        |                        |                   |                                        |
| Model 1              | 1 (ref)                                   | 0.61 (0.32, 1.20)    | 0.92 (0.51, 1.67)      | 0.70 (0.37, 1.32)      | 1.32 (0.74, 2.33) | 1.17 (0.98, 1.40)                      |
| Model 2              | 1 (ref)                                   | 0.59 (0.30, 1.16)    | 0.82 (0.45, 1.48)      | 0.60 (0.31, 1.13)      | 0.95 (0.52, 1.74) | 1.04 (0.86, 1.27)                      |
| Model 3              | 1 (ref)                                   | 0.60 (0.31, 1.17)    | 0.83 (0.46, 1.51)      | 0.59 (0.31, 1.12)      | 0.94 (0.51, 1.73) | 1.04 (0.85, 1.26)                      |
|                      | <b>DC quintiles (10<sup>-3</sup>/kPa)</b> |                      |                        |                        |                   | <b>DC continuous per 1 SD (6.97)</b>   |
|                      | <b>&lt; 12.21</b>                         | <b>12.22 – 15.48</b> | <b>15.49 – 18.66</b>   | <b>18.67 – 23.25</b>   | <b>&gt; 23.28</b> |                                        |
| Vascular dementia, n | 41                                        | 26                   | 16                     | 10                     | 9                 | 102                                    |
| N at risk            | 908                                       | 910                  | 906                    | 909                    | 910               | 4,543                                  |
| <b>OR (95% CI)</b>   |                                           |                      |                        |                        |                   |                                        |
| Model 1              | 1 (ref)                                   | 0.86 (0.51, 1.44)    | 0.66 (0.36, 1.22)      | 0.46 (0.22, 0.95)      | 0.53 (0.25, 1.14) | 0.75 (0.57, 0.97)                      |
| Model 2              | 1 (ref)                                   | 0.95 (0.56, 1.62)    | 0.83 (0.44, 1.56)      | 0.58 (0.27, 1.24)      | 0.73 (0.32, 1.65) | 0.87 (0.65, 1.15)                      |
| Model 3              | 1 (ref)                                   | 0.94 (0.55, 1.60)    | 0.83 (0.44, 1.57)      | 0.59 (0.28, 1.26)      | 0.74 (0.33, 1.68) | 0.87 (0.66, 1.16)                      |

Model 1: adjusted for age, sex, race/center, education, APOE ε4.

Model 2: adjusted for model 1 plus body mass index, systolic blood pressure, smoking status, pack-years of smoking.

Model 3: adjusted for model 2 plus antihypertensive medications, diabetes status.

Abbreviations: OR = odds ratio; SD = standard deviation; cIMT = carotid intima-media thickness; IAD = interadventitial diameter; DC = distensibility coefficient

**Table S2. Odds ratios (95% confidence intervals) of Alzheimer's disease-related dementia by quintiles or per 1-SD increment: the Atherosclerosis Risk in Communities (ARIC) study, 1990–2013.**

|                        | <b>cIMT quintiles (mm)</b>                |                      |                        |                        |                   | <b>cIMT continuous per 1 SD (0.15)</b> |
|------------------------|-------------------------------------------|----------------------|------------------------|------------------------|-------------------|----------------------------------------|
|                        | <b>&lt; 0.58</b>                          | <b>0.58 – 0.64</b>   | <b>0.65 – &lt;0.71</b> | <b>0.71 – &lt;0.80</b> | <b>&gt; 0.80</b>  |                                        |
| AD-related dementia, n | 11                                        | 17                   | 23                     | 21                     | 31                | 103                                    |
| N at risk              | 1,163                                     | 1,164                | 1,164                  | 1,164                  | 1,164             | 5,819                                  |
| <b>OR (95% CI)</b>     |                                           |                      |                        |                        |                   |                                        |
| Model 1                | 1 (ref)                                   | 1.28 (0.59, 2.79)    | 1.53 (0.73, 3.22)      | 1.27 (0.59, 2.71)      | 1.50 (0.72, 3.12) | 1.12 (0.94, 1.35)                      |
| Model 2                | 1 (ref)                                   | 1.25 (0.57, 2.72)    | 1.50 (0.72, 3.15)      | 1.22 (0.57, 2.62)      | 1.41 (0.67, 2.97) | 1.11 (0.92, 1.34)                      |
| Model 3                | 1 (ref)                                   | 1.26 (0.58, 2.75)    | 1.50 (0.71, 3.14)      | 1.22 (0.57, 2.63)      | 1.40 (0.67, 2.96) | 1.10 (0.91, 1.33)                      |
|                        | <b>IAD quintiles (mm)</b>                 |                      |                        |                        |                   | <b>IAD continuous per 1 SD (0.83)</b>  |
|                        | <b>&lt; 6.77</b>                          | <b>6.77 – 7.18</b>   | <b>7.19 – 7.57</b>     | <b>7.58 – 8.10</b>     | <b>&gt; 8.11</b>  |                                        |
| AD-related dementia, n | 16                                        | 10                   | 21                     | 28                     | 19                | 94                                     |
| N at risk              | 1,125                                     | 1,104                | 1,113                  | 1,110                  | 1,120             | 5,572                                  |
| <b>OR (95% CI)</b>     |                                           |                      |                        |                        |                   |                                        |
| Model 1                | 1 (ref)                                   | 0.60 (0.27, 1.35)    | 1.10 (0.56, 2.17)      | 1.28 (0.66, 2.49)      | 0.70 (0.34, 1.47) | 0.97 (0.78, 1.21)                      |
| Model 2                | 1 (ref)                                   | 0.58 (0.26, 1.31)    | 1.05 (0.53, 2.08)      | 1.19 (0.60, 2.35)      | 0.60 (0.27, 1.30) | 0.92 (0.73, 1.17)                      |
| Model 3                | 1 (ref)                                   | 0.59 (0.26, 1.32)    | 1.06 (0.53, 2.11)      | 1.21 (0.61, 2.39)      | 0.61 (0.28, 1.32) | 0.92 (0.73, 1.17)                      |
|                        | <b>DC quintiles (10<sup>-3</sup>/kPa)</b> |                      |                        |                        |                   | <b>DC continuous per 1 SD (6.97)</b>   |
|                        | <b>&lt; 12.21</b>                         | <b>12.22 – 15.48</b> | <b>15.49 – 18.66</b>   | <b>18.67 – 23.25</b>   | <b>&gt; 23.28</b> |                                        |
| AD-related dementia, n | 31                                        | 13                   | 12                     | 10                     | 8                 | 74                                     |
| N at risk              | 908                                       | 910                  | 906                    | 909                    | 910               | 4,543                                  |
| <b>OR (95% CI)</b>     |                                           |                      |                        |                        |                   |                                        |
| Model 1                | 1 (ref)                                   | 0.51 (0.26, 1.00)    | 0.57 (0.28, 1.15)      | 0.51 (0.24, 1.08)      | 0.49 (0.21, 1.11) | 0.86 (0.64, 1.14)                      |
| Model 2                | 1 (ref)                                   | 0.52 (0.26, 1.02)    | 0.58 (0.28, 1.19)      | 0.52 (0.24, 1.14)      | 0.50 (0.20, 1.20) | 0.89 (0.65, 1.21)                      |
| Model 3                | 1 (ref)                                   | 0.51 (0.26, 1.00)    | 0.57 (0.28, 1.18)      | 0.52 (0.24, 1.14)      | 0.50 (0.20, 1.21) | 0.89 (0.65, 1.21)                      |

Model 1: adjusted for age, sex, race/center, education, APOE ε4.

Model 2: adjusted for model 1 plus body mass index, systolic blood pressure, smoking status, pack-years of smoking.

Model 3: adjusted for model 2 plus antihypertensive medications, diabetes status.

Abbreviations: AD = Alzheimer's disease; OR = odds ratio; SD = standard deviation; cIMT = carotid intima-media thickness;

IAD = interadventitial diameter; DC = distensibility coefficient
